# Supplementary material
Source: PubMed Central journal article supplement (PMC2764950)
Supplement: 0903585106_ST1_PDF.pdf [file 0903585106_ST1_PDF.pdf]

**Table S1. General genomic features of O26, O111 and O103 EHECs, O157 EHEC and 21 other, fully sequenced *E. coli*/Shigella strains**

| Strain                      | Phylogroup | Pathotype  | Serotype    | Chromosome |             |      |                  | Plasmid         |                           |                         | No. of CDS family | Reference  |
|-----------------------------|------------|------------|-------------|------------|-------------|------|------------------|-----------------|---------------------------|-------------------------|-------------------|------------|
|                             |            |            |             | Size (kb)  | CDS*        | tRNA | Accession number | Size (kb)       | CDS in total <sup>a</sup> | Accession number        |                   |            |
| O157 Sakai†                 | E          | EHEC       | O157:H7     | 5,498      | 5,363 (247) | 105  | BA000007         | 93/3            | 95 (11)                   | AB011548-9              | 4,807             | (1)        |
| O26_11368                   | B1         | EHEC       | O26:H11     | 5,697      | 5,609 (254) | 101  | AP010953         | 85/63/6/4       | 186 (31)                  | AP010954-7              | 4,946             | This study |
| O111_11128                  | B1         | EHEC       | O111:H-     | 5,371      | 5,264 (291) | 106  | AP010960         | 205/98/78/8/7   | 468 (33)                  | AP010961-5              | 4,965             | This study |
| O103_12009                  | B1         | EHEC       | O103:H2     | 5,449      | 5,264 (209) | 98   | AP010958         | 72              | 90 (21)                   | AP010959                | 4,705             | This study |
| E24377A                     | B1         | EPEC       | O139:H28    | 4,979      | 4,873 (118) | 91   | CP000800         | 79/74/70/34/6/5 | 242 (34)                  | CP000795-9, 801         | 4,760             | (2)        |
| SE11                        | B1         | commensal  | O152:H28    | 4,888      | 4,679       | 86   | AP009240         | 100/91/61/7/5/4 | 323                       | AP009241-6              | 4,821             | (3)        |
| IAI1                        | B1         | commensal  | O8          | 4,701      | 4,491 (51)  | 94   | CU928160         | -               | -                         | -                       | 4,267             | (4)        |
| 55989                       | B1         | EAEC       | -           | 5,155      | 4,969 (79)  | 86   | CU928145         | 72              | 100 (7)                   | CU928159                | 4,635             | (4)        |
| MG1655                      | A          | laboratory | -           | 4,639      | 4,294 (101) | 88   | U00096           | -               | -                         | -                       | 4,033             | (5)        |
| HS                          | A          | commensal  | O9          | 4,643      | 4,478 (94)  | 88   | CP000802         | -               | -                         | -                       | 4,248             | (2)        |
| E2348/69                    | B2         | EPEC       | O127:H6     | 4,965      | 4,703 (145) | 92   | FM180568         | 97/6            | 121 (23)                  | FM180569-70             | 4,497             | (6)        |
| CFT073                      | B2         | ExPEC      | O6:K2:H1    | 5,231      | 5,473 (94)  | 89   | AE14075          | -               | -                         | -                       | 5,101             | (7)        |
| 536                         | B2         | ExPEC      | O6:K15:H7   | 4,938      | 4,685       | 81   | CP000247         | -               | -                         | -                       | 4,457             | (8)        |
| UTI89                       | B2         | ExPEC      | -           | 5,065      | 5,066       | 88   | CP000243         | 114             | 145                       | CP000244                | 5,073             | (9)        |
| APEC O1                     | B2         | ExPEC      | O1:K1:H7    | 5,082      | 4,467       | 94   | CP000468         | 241/174         | 423                       | DQ517526,<br>DQ381420   | 4,730             | (10)       |
| S88                         | B2         | ExPEC      | O45:K1:H7   | 5,032      | 4,859 (90)  | 91   | CU928161         | 134             | 144 (9)                   | CU928146                | 4,666             | (4)        |
| ED1a                        | B2         | commensal  | O81         | 5,210      | 5,129 (95)  | 91   | CU928162         | 120             | 150 (11)                  | CU928147                | 4,634             | (4)        |
| IAI39                       | D          | ExPEC      | O7:K1       | 5,132      | 4,906 (80)  | 88   | CU928164         | -               | -                         | -                       | 4,432             | (4)        |
| UMN026                      | D          | ExPEC      | O17:K52:H18 | 5,202      | 4,918 (45)  | 88   | CU928163         | 122/34          | 198 (8)                   | CU928148-9              | 4,867             | (4)        |
| <i>S. boydii</i> Sb227      | S1         | shigella   | 4           | 4,520      | 4,353 (217) | 91   | CP000036         | 127             | 149                       | CP000037                | 3,550             | (11)       |
| <i>S. sonnei</i> Ss046      | SS         | shigella   | -           | 4,825      | 4,434 (210) | 97   | CP000038         | 214/8/5/2       | 252                       | CP000039,<br>CP000641-3 | 3,819             | (11)       |
| <i>S. flexneri</i> Sf301    | S3         | shigella   | 2a          | 4,607      | 4,434 (254) | 97   | AE005674         | 222             | 267                       | AF386526                | 3,729             | (12)       |
| <i>S. flexneri</i> Sf2457T  | S3         | shigella   | 2a          | 4,599      | 4,073 (372) | 98   | AE014073         | -               | -                         | -                       | 3,514             | (13)       |
| <i>S. flexneri</i> Sf8401   | S3         | shigella   | 5b          | 4,574      | 4,316 (198) | 97   | CP000266         | -               | -                         | -                       | 3,577             | (14)       |
| <i>S. dysenteriae</i> Sd197 | SD1        | shigella   | 1           | 4,369      | 4,557 (285) | 85   | CP000034         | 183/9           | 231                       | CP000035,<br>CP000640   | 3,371             | (11)       |

\*Total numbers of CDSs including pseudogenes are shown. Numbers of pseudogenes are indicated in parentheses if available.

†Another O157:H7 strain (EDL933) has been sequenced (15).

Reference list:

- Hayashi T, et al. (2001) Complete genome sequence of enterohemorrhagic *Escherichia coli* O157:H7 and genomic comparison with a laboratory strain K-12. *DNA Res* 8:11-22.
- Rasko DA, et al. (2008) The pangenome structure of *Escherichia coli*: comparative genomic analysis of *E. coli* commensal and pathogenic isolates. *J Bacteriol* 190:6881-6893.
- Oshima K, et al. (2008) Complete genome sequence and comparative analysis of the wild-type commensal *Escherichia coli* strain SE11 isolated from a healthy adult. *DNA Res* 15:375-386.
- Touchon M, et al. (2009) Organised genome dynamics in the *Escherichia coli* species results in highly diverse adaptive paths. *PLoS Genet* 5:e1000344.

5. Blattner FR, et al. (1997) The complete genome sequence of *Escherichia coli* K-12. *Science* 277:1453-1474.
6. Iguchi A, et al. (2008) The complete genome sequence and comparative genome analysis of enteropathogenic *E. coli* O127:H6 strain E2348/69. *J Bacteriol* 191:347-354.
7. Welch RA, et al. (2002) Extensive mosaic structure revealed by the complete genome sequence of uropathogenic *Escherichia coli*. *Proc Natl Acad Sci U S A* 99:17020-17024.
8. Brzuszkiewicz E, et al. (2006) How to become a uropathogen: comparative genomic analysis of extraintestinal pathogenic *Escherichia coli* strains. *Proc Natl Acad Sci U S A* 103:12879-12884.
9. Chen SL, et al. (2006) Identification of genes subject to positive selection in uropathogenic strains of *Escherichia coli*: a comparative genomics approach. *Proc Natl Acad Sci U S A* 103:5977-5982.
10. Johnson TJ, et al. (2007) The genome sequence of avian pathogenic *Escherichia coli* strain O1:K1:H7 shares strong similarities with human extraintestinal pathogenic *E. coli* genomes. *J Bacteriol* 189:3228-3236.
11. Yang F, et al. (2005) Genome dynamics and diversity of *Shigella* species, the etiologic agents of bacillary dysentery. *Nucleic Acids Res* 33:6445-6458.
12. Jin Q, et al. (2002) Genome sequence of *Shigella flexneri* 2a: insights into pathogenicity through comparison with genomes of *Escherichia coli* K-12 and O157. *Nucleic Acids Res* 30:4432-4441.
13. Wei J, et al. (2003) Complete genome sequence and comparative genomics of *Shigella flexneri* serotype 2a strain 2457T. *Infect Immun* 71:2775-2786.
14. Nie H, et al. (2006) Complete genome sequence of *Shigella flexneri* 5b and comparison with *Shigella flexneri* 2a. *BMC Genomics* 7:173.
15. Perna NT, et al. (2001) Genome sequence of enterohaemorrhagic *Escherichia coli* O157:H7. *Nature* 409:529-533.
