# Supplementary material
Source: PubMed Central journal article supplement (PMC2764950)
Supplement: 0903585106_ST2_PDF.pdf [file 0903585106_ST2_PDF.pdf]

Table S2. Summary of prophages and integrative elements of O26, O111 and O103

| Name             | Position (start) | Position (end) | Length (bp) | Integration site     | attL/R | Type                 | Virulence-related genes and other notable features                                         |
|------------------|------------------|----------------|-------------|----------------------|--------|----------------------|--------------------------------------------------------------------------------------------|
| <b>O26</b>       |                  |                |             |                      |        |                      |                                                                                            |
| <b>Prophages</b> |                  |                |             |                      |        |                      |                                                                                            |
| EC026_P01        | 612033           | 662218         | 50186       | tRNA ( <i>argU</i> ) | 45     | lambda-like          | <i>bor, lom, ompT</i> , hydrolase                                                          |
| EC026_P02        | 890186           | 942733         | 52549       | <i>ybhC - ybhB</i>   | 15     | lambda-like          | <i>sfpA, lom, nleH. cifψ, nleG, espJ</i>                                                   |
| EC026_P03        | 1170970          | 1220174        | 49206       | <i>yccA - ycdG</i>   | 65     | lambda-like          | tRNA (IRR), <i>pchABC</i> -homolog, <i>lom, tccP2, espVψ</i>                               |
| EC026_P04        | 1220222          | 1271596        | 51376       | <i>yccA - ycdG</i>   | 11     | lambda-like          | tRNA (IRR), <i>pchABC</i> -homolog, <i>lom</i>                                             |
| EC026_P05        | 1472794          | 1523542        | 50749       | <i>potC</i>          | 12     | lambda-like          | tRNA (IRψR), <i>lom, espO, espK</i>                                                        |
| EC026_P06        | 1559000          | 1614503        | 55489       | <i>wrbA</i>          | 13     | lambda-like          | <i>stxI, lom, nleI/nleG, nleG, nleG, espW, nleG, espM</i>                                  |
| EC026_P07        | 1619447          | 1630545        | 11099       | <i>ycfD - phoQ</i>   | 10     | untypable (Sp7-like) | <i>pchE</i> -homolog                                                                       |
| EC026_P08        | 1739930          | 1774688        | 34759       | <i>ompW</i>          | 28     | lambda-like          | <i>paa/adfO</i> , tRNA (IRψR), <i>nleG, nleA/espIψ, nleH, nleF, espO, nleG, espM, nleG</i> |
| EC026_P09        | 1870372          | 1917976        | 47606       | <i>ydaO</i>          | 43     | lambda-like          | <i>lom, nleG, nleG, nleG</i>                                                               |
| EC026_P10        | 2120369          | 2170396        | 49880       | <i>ydfJ</i>          | 148    | lambda-like          | <i>lom</i>                                                                                 |
| EC026_P11        | 2170260          | 2217842        | 47583       | <i>ydfJ</i>          | 20     | lambda-like          | <i>lom, nleC, pchABC</i> -homolog, tRNA (IRR)                                              |
| EC026_P12        | 2239231          | 2253875        | 14645       | <i>ydgG</i>          | 23     | untypable (Sp7-like) | <i>pchE</i> -homolog                                                                       |
| EC026_P13        | 2374989          | 2410628        | 35640       | <i>btuC - ihfA</i>   | 25     | P2-like              |                                                                                            |
| EC026_P14        | 2532804          | 2582170        | 49367       | <i>pphA - yebY</i>   | 32     | lambda-like          | <i>nleG, ospB, lom</i>                                                                     |
| EC026_P15        | 2668166          | 2705497        | 37331       | tRNA ( <i>leuZ</i> ) | 121    | P2-like              |                                                                                            |

|                             |         |         |       |                       |    |                      |                                                                                                                             |
|-----------------------------|---------|---------|-------|-----------------------|----|----------------------|-----------------------------------------------------------------------------------------------------------------------------|
| EC026_P16                   | 3041507 | 3050283 | 8777  | tRNA ( <i>proL</i> )  | 23 | untypable (Sp7-like) |                                                                                                                             |
| EC026_P17                   | 3089156 | 3138905 | 49750 | <i>yfaT</i>           | 11 | lambda-like          | <i>nleG, nleG, lom, bor</i>                                                                                                 |
| EC026_P18                   | 3264205 | 3304868 | 40664 | tRNA ( <i>argW</i> )  | 16 | P22-like             |                                                                                                                             |
| EC026_P19                   | 3604902 | 3659140 | 54239 | tmRNA ( <i>ssrA</i> ) | 25 | lambda-like          | <i>espK, espN, espX, lom, pchABC-homolog, tRNA (IRR)</i>                                                                    |
| EC026_P20                   | 4952596 | 4966595 | 14000 | tRNA ( <i>selC</i> )  | 17 | P4-like              |                                                                                                                             |
| EC026_P21                   | 5524023 | 5538033 | 14011 | tRNA ( <i>leuX</i> )  | 18 | P4 like              |                                                                                                                             |
| <b>Integrative elements</b> |         |         |       |                       |    |                      |                                                                                                                             |
| ECO26_IE01                  | 321433  | 333862  | 12430 | tRNA ( <i>thrW</i> )  | 21 |                      |                                                                                                                             |
| ECO26_IE02                  | 1290655 | 1386761 | 96108 | tRNA ( <i>serX</i> )  | 19 | SpLE1-like           | urease operon, tellurium resistance, <i>iha, hecB, pchD</i> -homolog, siderophore biosynthesis operon, <i>aidA-I, traTψ</i> |
| ECO26_IE03                  | 2753288 | 2784375 | 31088 | tRNA ( <i>asnT</i> )  | 5  |                      | siderophore biosynthesis                                                                                                    |
| ECO26_IE04                  | 3304869 | 3331559 | 26692 | tRNA ( <i>argW</i> )  | 19 |                      | <i>aidA-I</i>                                                                                                               |
| ECO26_IE05                  | 3659141 | 3665986 | 6846  | tmRNA ( <i>ssrA</i> ) | ND |                      |                                                                                                                             |
| ECO26_IE06                  | 3894472 | 3903556 | 9085  | tRNA ( <i>glyU</i> )  | 17 |                      |                                                                                                                             |
| ECO26_IE07                  | 4029622 | 4037548 | 7927  | tRNA ( <i>pheV</i> )  | 11 |                      | <i>iha</i>                                                                                                                  |
| ECO26_IE08                  | 5328871 | 5387573 | 58703 | tRNA ( <i>pheU</i> )  | 17 | LEE                  | T3SS machinery, <i>ospB, espG, espZ, espH, map, tir, espB, espF, efaI/lifA, nleE, nleB, espL</i>                            |
| ECO26_IE09                  | 5538034 | 5583667 | 45634 | tRNA ( <i>leuX</i> )  | 18 | □                    | Iron-transport system, <i>aidA-I</i>                                                                                        |

## O111

### Prophages

|            |         |         |       |                           |    |             |                                                                                                                |
|------------|---------|---------|-------|---------------------------|----|-------------|----------------------------------------------------------------------------------------------------------------|
| ECO111_P01 | 607730  | 622448  | 14719 | tRNA ( <i>argU</i> )      | 45 | lambda-like | <i>ompT</i> , hydrolase                                                                                        |
| ECO111_P02 | 850421  | 887546  | 37126 | <i>ybhC</i> - <i>ybhB</i> | 19 | lambda-like | <i>sfpA</i> , <i>lom</i> , <i>nleH</i> , <i>cifψ</i> , <i>nleGψ</i> , <i>espJ</i>                              |
| ECO111_P03 | 1120777 | 1148352 | 25756 | tRNA ( <i>serT</i> )      | 65 | lambda-like | tRNA (IRR), <i>pchABC</i> -homolog, <i>tccP2</i> , <i>espVψ</i>                                                |
| ECO111_P04 | 1183556 | 1244155 | 60600 | <i>wrbA</i>               | 13 | lambda-like | tRNA (IRR), <i>bor</i> , <i>lom</i>                                                                            |
| ECO111_P05 | 1435922 | 1493397 | 57699 | <i>potC</i>               | 12 | lambda-like | tRNA (IRψR), <i>lom</i> , <i>espX</i> , <i>espN</i> , <i>espO</i> , <i>espK</i>                                |
| ECO111_P06 | 1604962 | 1646735 | 41774 | <i>ompW</i>               | 18 | lambda-like | tRNA (Iψ), <i>lom</i> , <i>ospG</i>                                                                            |
| ECO111_P07 | 1742478 | 1773420 | 30943 | <i>ydaO</i>               | 43 | lambda-like | <i>lom</i> , <i>nleG</i> , <i>nleG</i> , <i>nleG</i> , <i>sod</i>                                              |
| ECO111_P08 | 1976596 | 1999287 | 22692 | <i>ydfJ</i>               | 12 | lambda-like | tRNA (IRψR), <i>nleG</i> , <i>ospB</i> , <i>paa/adjO</i>                                                       |
| ECO111_P09 | 2002865 | 2048861 | 45997 | <i>tonB</i>               | 8  | lambda-like | <i>nleG</i> , <i>espM</i> , <i>nleG</i> , <i>espO</i> , <i>nleFψ</i> , <i>nleH</i> , <i>nleGψ</i> , <i>lom</i> |
| ECO111_P10 | 2191144 | 2223436 | 32293 | <i>btuC</i> - <i>ihfA</i> | 17 | P2-like     |                                                                                                                |
| ECO111_P11 | 2392300 | 2440434 | 48135 | <i>yecE</i>               | 21 | lambda-like | tRNA (IRR), <i>stx2</i> , <i>nleC</i> , <i>lom</i> , <i>sod</i> , serine protease                              |
| ECO111_P12 | 2535491 | 2585400 | 49910 | tRNA ( <i>serU</i> )      | 64 | lambda-like | tRNA (IRR), <i>nleC</i> , <i>lom</i> , <i>pchABC</i> -homolog                                                  |
| ECO111_P13 | 2617488 | 2660928 | 43441 | <i>dacD</i> - <i>sbcB</i> | 15 | lambda-like | tRNA (AT)                                                                                                      |
| ECO111_P14 | 2855089 | 2864610 | 9522  | tRNA ( <i>proL</i> )      | 15 | untypable   |                                                                                                                |
| ECO111_P15 | 2904032 | 2917820 | 13694 | <i>yfaT</i>               | 10 | lambda-like | <i>nleA/espI</i> , <i>nleG</i>                                                                                 |
| ECO111_P16 | 3316538 | 3346200 | 29663 | tmRNA ( <i>ssrA</i> )     | ND | lambda-like | <i>stxI</i> , <i>lom</i>                                                                                       |
| ECO111_P17 | 4957389 | 5001514 | 44126 | <i>yjbN</i>               | 16 | lambda-like | tRNA (IRR), <i>pchABC</i> -homolog, <i>lom</i> , <i>nleGψ</i> , <i>espW</i> , <i>nleG</i> , <i>espM</i> ,      |

---

**Integrative elements**

|             |        |        |       |                      |    |  |  |
|-------------|--------|--------|-------|----------------------|----|--|--|
| ECO111_IE01 | 330269 | 345177 | 14909 | tRNA ( <i>thrW</i> ) | ND |  |  |
|-------------|--------|--------|-------|----------------------|----|--|--|

|              |         |         |       |                           |    |                   |                                                                                                                                                           |
|--------------|---------|---------|-------|---------------------------|----|-------------------|-----------------------------------------------------------------------------------------------------------------------------------------------------------|
| ECO111_IE02  | 1263858 | 1349833 | 85977 | tRNA ( <i>serX</i> )      | 15 | SpLE1-like        | urease operon, tellurium resistance operon, <i>iha</i> , <i>pchD</i> -homolog, siderophore biosynthesis operon, <i>hecB</i>                               |
| ECO111_IE03  | 2586494 | 2589296 | 2803  | tRNA ( <i>asnT</i> )      | ND |                   |                                                                                                                                                           |
| ECO111_IE04  | 3346201 | 3351149 | 4949  | tmRNA ( <i>ssrA</i> )     | 14 |                   |                                                                                                                                                           |
| ECO111_IE05  | 3705294 | 3759468 | 54198 | tRNA ( <i>pheV</i> )      | 22 | LEE               | T3SS machinery, <i>espL</i> , <i>nleB</i> , <i>nleE</i> , <i>espG</i> , <i>espF</i> , <i>espB</i> , <i>tir</i> , <i>map</i> , <i>espH</i> , <i>espZ</i> , |
| ECO111_IE06a | 5086027 | 5105434 | 19408 | <i>lysU</i> - <i>yjfZ</i> | ND | SpLE3/OI-122-like | <i>efa1/lifA</i> , <i>nleE</i> , <i>nleB</i> , <i>espLψ</i>                                                                                               |
| ECO111_IE06b | 5170911 | 5181064 | 10154 | tRNA ( <i>pheU</i> )      | ND | SpLE3/OI-122-like | <i>pagC</i>                                                                                                                                               |
| ECO111_IE07  | 5245010 | 5265674 | 20665 | tRNA ( <i>leuX</i> )      | ND |                   | Lon protease-homolog                                                                                                                                      |

---

## O103

### Prophages

|            |         |         |       |                           |    |                      |                                                                                                                       |
|------------|---------|---------|-------|---------------------------|----|----------------------|-----------------------------------------------------------------------------------------------------------------------|
| ECO103_P01 | 571907  | 618386  | 46527 | tRNA ( <i>argU</i> )      | 45 | lambda-like          | <i>bor</i> , <i>lom</i> , <i>ompT</i> , hydrolase                                                                     |
| ECO103_P02 | 840062  | 881288  | 41227 | <i>ybhC</i> - <i>ybhB</i> | 14 | lambda-like          | <i>sfpA</i> , <i>lom</i> , <i>nleB</i> , <i>nleCψ</i> , <i>nlaH</i> , <i>cifψ</i> , <i>nleG</i> , <i>nleA/espI</i>    |
| ECO103_P03 | 1268341 | 1321097 | 52757 | <i>potC</i>               | 12 | lambda-like          | <i>lom</i> , <i>espX</i> , <i>espN</i> , <i>espK</i>                                                                  |
| ECO103_P04 | 1325875 | 1336955 | 11081 | <i>ycfD</i> - <i>phoQ</i> | 10 | untypable (Sp7-like) | <i>pchE</i> -homolog                                                                                                  |
| ECO103_P05 | 1445519 | 1491434 | 45916 | <i>ompW</i>               | 28 | lambda-like          | <i>lom</i> , <i>ospGψ</i>                                                                                             |
| ECO103_P06 | 1785654 | 1810082 | 24429 | <i>ydfJ</i>               | 11 | lambda-like          | <i>paa/adfO</i> , <i>nleGψ</i> , <i>ospB</i> ,                                                                        |
| ECO103_P07 | 1953662 | 1991638 | 37977 | <i>btuC</i> - <i>ihfA</i> | 25 | P2-like              |                                                                                                                       |
| ECO103_P08 | 2140858 | 2192142 | 51285 | <i>yecE</i>               | 36 | lambda-like          | tRNA (IRR), <i>espM</i> , <i>nleG</i> , <i>espW</i> , <i>nleG</i> , <i>nleG</i> , <i>lom</i>                          |
| ECO103_P09 | 2282685 | 2334021 | 51338 | tRNA ( <i>serU</i> )      | 38 | lambda-like          | tRNA (IRR), <i>nleF</i> , <i>nleHψ</i> , <i>nleCψ</i> , <i>nleB</i> , <i>lom</i> , <i>pchABC</i> -homolog, <i>sod</i> |

|            |         |         |       |                      |    |                      |                                                                                                                   |
|------------|---------|---------|-------|----------------------|----|----------------------|-------------------------------------------------------------------------------------------------------------------|
| ECO103_P10 | 2334068 | 2387198 | 53132 | tRNA ( <i>serU</i> ) | 65 | lambda-like          | tRNA (IRR), <i>espK</i> , <i>espO</i> , <i>lom</i> , <i>pchABC</i> -homolog                                       |
| ECO103_P11 | 2387169 | 2435990 | 48822 | tRNA ( <i>serU</i> ) | 64 | lambda-like          | tRNA (IR $\psi$ R), <i>espV<math>\psi</math></i> , <i>tccP2</i> , <i>lom</i> , <i>pchABC</i> -homolog, <i>sod</i> |
| ECO103_P12 | 2861734 | 2924345 | 62612 | tRNA ( <i>argW</i> ) | 54 | lambda-like          | tRNA (IRR), <i>stx2</i> , <i>lom</i>                                                                              |
| ECO103_P13 | 3143750 | 3186459 | 42710 | <i>yfhL</i>          | 42 | untypable            |                                                                                                                   |
| ECO103_P14 | 4647362 | 4663093 | 15851 | <i>yicC-dinD</i>     | 52 | untypable (Sp7-like) | <i>pch</i> -homolog, <i>pch</i> -homolog                                                                          |
| ECO103_P15 | 5364180 | 5418116 | 53937 | <i>prfC</i>          | 44 | lambda-like          | <i>stx1</i> , <i>lom</i> , <i>nleG</i> , <i>nleG<math>\psi</math></i> ,                                           |

---

**Integrative elements**

|             |         |         |       |                       |    |                   |                                                                                                                                                                                                                                                                                                 |
|-------------|---------|---------|-------|-----------------------|----|-------------------|-------------------------------------------------------------------------------------------------------------------------------------------------------------------------------------------------------------------------------------------------------------------------------------------------|
| ECO103_IE01 | 3244584 | 3250089 | 5506  | tmRNA ( <i>ssrA</i> ) | ND |                   |                                                                                                                                                                                                                                                                                                 |
| ECO103_IE02 | 3501014 | 3506621 | 5608  | tRNA ( <i>glyU</i> )  | 23 |                   |                                                                                                                                                                                                                                                                                                 |
| ECO103_IE03 | 3627153 | 3714574 | 87422 | tRNA ( <i>pheV</i> )  | 5  | LEE               | T3SS machinery, <i>pagC</i> , <i>espL</i> , <i>nleB</i> , <i>nleE</i> , <i>efa1/lifA</i> , <i>aidA-I<math>\psi</math></i> , <i>espO</i> , <i>espK</i> , <i>nleG</i> , <i>espM</i> , <i>espF</i> , <i>espB</i> , <i>tir</i> , <i>map</i> , <i>espH</i> , <i>espZ</i> , <i>espG</i> , <i>ospB</i> |
| ECO103_IE04 | 3826718 | 3891310 | 64593 | tRNA ( <i>ileX</i> )  | 94 | SpLE1-like        | tellurium resistance, <i>traT<math>\psi</math></i> , urease operon $\psi$ , autotransporter serine protease                                                                                                                                                                                     |
| ECO103_IE05 | 5073158 | 5119905 | 46748 | tRNA ( <i>pheU</i> )  | 17 | SpLE3/OI-122-like | <i>aidA-I</i> , <i>efa1/lifA</i> , <i>nleE</i> , <i>nleB</i> , <i>espL</i> , <i>pagC</i>                                                                                                                                                                                                        |
| ECO103_IE06 | 5256653 | 5290611 | 33959 | tRNA ( <i>leuX</i> )  | 17 |                   |                                                                                                                                                                                                                                                                                                 |

---

ND, not detected;  $\psi$ , pseudogene.
