# Supplementary material
Source: PubMed Central journal article supplement (PMC2764950)
Supplement: 0903585106_ST3_PDF.pdf [file 0903585106_ST3_PDF.pdf]

**Table S3. Summary of the plasmids present in the four EHEC strains**

| Name    | Size    | Number of CDS* | Replicons             | Comment                                                                                                                                                                                        |
|---------|---------|----------------|-----------------------|------------------------------------------------------------------------------------------------------------------------------------------------------------------------------------------------|
| pO157   | 92,721  | 92 (11)        | F & R100              | Virulence plasmid [enterohemolysin (HylA-D), lipid A modification system (Ecf operon), typeII secretion system, adherence factor Efa1, StcE protease, serine protease (EspP), catalase (KatP)] |
| pOSAK1  | 3,306   | 3              | ColE1                 |                                                                                                                                                                                                |
| pO26_1  | 85,167  | 93 (28)        | F & ?                 | Virulence plasmid [enterohemolysin (HylA-D), lipid A modification system (Ecf operon), adherence factor Efa1]                                                                                  |
| pO26_2  | 63,365  | 84 (3)         | R100                  | Drug resistance (kanamycin)                                                                                                                                                                    |
| pO26_3  | 5,686   | 6              | ColE1                 | Restriction modification system                                                                                                                                                                |
| pO26_4  | 4,073   | 3              | unkown                |                                                                                                                                                                                                |
| pO111_1 | 204,604 | 233 (11)       | RSF1010 & R27[incHII] | Multi-drug resistance (ampicilin, kanamycin, tetracycline, streptomycin, sulfonamide and mercury)                                                                                              |
| pO111_2 | 97,897  | 125 (4)        | P1                    | Almost identical to bacteriophage P1                                                                                                                                                           |
| pO111_3 | 77,690  | 90 (18)        | R100                  | Virulence plasmid [enterohemolysin (HylA-D), lipid A modification system (Ecf operon), serine protease (EspP), catalase (KatP)]                                                                |
| pO111_4 | 8,140   | 10             | ColE2                 | Two types of colicin                                                                                                                                                                           |
| pO111_5 | 6,673   | 10             | ColE1                 | Colicin                                                                                                                                                                                        |
| pO103   | 75,546  | 90 (21)        | F                     | Virulence plasmid [enterohemolysin (HylA-D), lipid A modification system (Ecf operon), typeII secretion system, StcE protease]                                                                 |

\* Numbers of pseudogenes are indicated in parentheses
