# Supplementary material
Source: PubMed Central journal article supplement (PMC2764950)
Supplement: 0903585106_ST4_PDF.pdf [file 0903585106_ST4_PDF.pdf]

**Table S4. Summary of the IS elements present in the EHEC strains**

| IS elements                    | O157    | O111     | O26      | O103     |
|--------------------------------|---------|----------|----------|----------|
| IS629                          | 23      | 49       | 13       | 35       |
| ISEc8                          | 11      | 7        | 9        | 9        |
| IS677                          | 7       | 6        | 6        | 7        |
| IS682                          | 4       | 3        | 4        | 9        |
| IS1(Nuxi)                      | 6       | 5        | 4        | 4        |
| IS2                            | 4       | 5        | 2        | 4        |
| IS609                          | 4       | 5        | 3        | 2        |
| IS3                            | 4       | 3        | 4        | 5        |
| IS1                            | 1       | 6        | 4        | 1        |
| IS604                          | 4       | 3        | 2        | 2        |
| IS630                          | 3       | 3        | 2        | 2        |
| IS102                          | 2       | 2        | 2        | 4        |
| IS911                          | 1       | 2        | 2        | 5        |
| IS608                          | 1       | 3        | 1        | 2        |
| IS683                          | 1       | 1        | 3        | 2        |
| IS621                          | 0       | 2        | 14       | 12       |
| ISCro1                         | 0       | 1        | 11       | 3        |
| IS600                          | 5       | 1        | 10       | 0        |
| IS30                           | 5       | 3        | 3        | 0        |
| IS91                           | 2       | 5        | 3        | 0        |
| ISEc22*                        | 0       | 0        | 7        | 1        |
| IS602                          | 2       | 4        | 0        | 1        |
| IS1414                         | 0       | 3        | 2        | 1        |
| IS21                           | 2       | 0        | 0        | 2        |
| IS26                           | 0       | 4        | 0        | 0        |
| IS1151                         | 1       | 1        | 1        | 0        |
| IS200                          | 1       | 1        | 1        | 0        |
| IS4 family IS element†         | 0       | 1        | 1        | 1        |
| ISSfl2                         | 0       | 1        | 0        | 1        |
| IS688                          | 2       | 0        | 0        | 0        |
| IS617                          | 1       | 1        | 0        | 0        |
| IS679                          | 1       | 0        | 0        | 0        |
| IS10                           | 0       | 1        | 0        | 0        |
| IS1397                         | 0       | 1        | 0        | 0        |
| IS1294                         | 0       | 0        | 1        | 0        |
| ISEc16                         | 0       | 0        | 1        | 0        |
| IS110/IS492 family IS element† | 0       | 0        | 1        | 0        |
| Others (transposase only)†     | 0       | 2        | 2        | 1        |
| Total copies‡                  | 98 (17) | 135 (31) | 119 (24) | 116 (14) |

\* Newly identified IS element.

† Intact forms are not present.

‡ Numbers of copies on plasmids are shown in parentheses.
