# Supplementary material
Source: PubMed Central journal article supplement (PMC2764950)
Supplement: 0903585106_ST5_PDF.pdf [file 0903585106_ST5_PDF.pdf]

**Table S5. Identification of EHEC/EPEC-specific genes and their locational and functional classifications**

| Category                                  | No. of CDS families* |          |                                    |          |                    |                |                  |           |         |        |          |
|-------------------------------------------|----------------------|----------|------------------------------------|----------|--------------------|----------------|------------------|-----------|---------|--------|----------|
|                                           | Total                | Location |                                    |          | Predicted function |                |                  |           |         |        |          |
|                                           |                      | Backbone | Prophages and integrative elements | Plasmids | Virulence-related  | Phage function | Plasmid function | O antigen | Fimbria | Others | Unknown  |
| EHEC/EPEC-specific†                       | 1,761 (427)          |          |                                    |          |                    |                |                  |           |         |        |          |
| Present in all the EHECs‡                 | 87 (34)              | 0        | 79 (34)                            | 8        | 51 (28)            | 8 (2)          | 0                | 0         | 0       | 4      | 24 (4)   |
| O157-specific                             | 314                  | 118      | 172                                | 24       | 29                 | 65             | 2                | 10        | 27      | 29     | 152      |
| O26-specific                              | 175                  | 21       | 120                                | 34       | 7                  | 29             | 15               | 8         | 0       | 7      | 109      |
| O111-specific                             | 430                  | 18       | 93                                 | 319      | 7                  | 19             | 108              | 17        | 0       | 29     | 250      |
| O103-specific                             | 174                  | 16       | 138                                | 20       | 20                 | 37             | 2                | 11        | 0       | 6      | 98       |
| E2348/69-specific                         | 353                  | nd       | nd                                 | nd       | nd                 | nd             | nd               | nd        | nd      | nd     | nd       |
| Others                                    | 228 (40)             | 22 (2)   | 197 (37)                           | 9 (1)    | 59 (18)            | 47 (5)         | 2 (1)            | 0         | 0       | 13 (1) | 107 (15) |
| Present in all the <i>E. coli</i> strains | 1,919                | nd       | nd                                 | nd       | nd                 | nd             | nd               | nd        | nd      | nd     | nd       |
| Absent in EHEC strains                    | 6,318                | nd       | nd                                 | nd       | nd                 | nd             | nd               | nd        | nd      | nd     | nd       |
| Others                                    | 2,942                | nd       | nd                                 | nd       | nd                 | nd             | nd               | nd        | nd      | nd     | nd       |
| Total                                     | 12,940               | nd       | nd                                 | nd       | nd                 | nd             | nd               | nd        | nd      | nd     | nd       |

\* All CDSs from the 25 fully sequenced *E. coli* and *Shigella* strains were grouped into 12,940 CDS families based on the results from BLASTP analysis. The numbers of CDS families of each strain were indicated in Table S1.

† CDS families that are present in at least one of the four EHEC and the EPEC (E2348/69) strains. The numbers of CDS families conserved in EPEC E2348/69 are indicated in parentheses.

‡ ECs numbers of the 87 genes (CDS families) that are present in all EHECs (O157, O26, O111 and O103) are listed below. Predicted functions of each CDS family are shown in parentheses. Best-hit homologues of each CDS family are also shown in parentheses (bacterial species and strains and amino acid sequence identities) if homologues showing  $\geq 50\%$  amino acid sequence identity (alignment length;  $\geq 60\%$  of the length of query sequence) were found in bacterial species/strains other than EHEC/EPEC strains in the nr database search.

**Virulence-related:** ECs0814 (systemic factor protein SfpA; *Salmonella* Typhi CT18, 72%) ECs0848 (T3SS secreted effector NleH1-1; *Citrobacter rodentium*, 83%) ECs1091/2182/2737 (transcriptional regulator PchABC family; no hit) ECs1322 (urease gamma subunit UreA; *Klebsiella pneumoniae* MGH 78578, 96%) ECs1323 (urease beta subunit UreB; *K. pneumoniae* 342, 82%) ECs1324 (urease alpha subunit UreC; *K. pneumoniae* MGH 78578, 90%) ECs1325 (urease accessory protein UreE; *K. pneumoniae* 342, 84%) ECs1326 (urease accessory protein UreF; *K. pneumoniae* MGH 78578, 79%) ECs1327 (urease accessory protein UreG; *Citrobacter* sp. 30\_2, 91%) ECs1560 (T3SS secreted effector EspX7; no hit) ECs1561 (T3SS secreted effector EspN; no hit) ECs1568 (T3SS secreted effector EspK; no hit) ECs1772 (porcine attaching-effacing associated protein Paa/adherence factor AdfO; *E. coli* ECL8389, 93%) ECs1995/2155 (T3SS secreted effector NleG family; no hit) ECs2226 (T3SS secreted effector NleG7; no hit) ECs2715 (T3SS secreted effector TccP/EspFU / EspF2-2; no hit) ECs3486 (T3SS secreted effector NleG8-2; no hit) ECs3487 (T3SS secreted effector EspW; no hit) ECs3855 (T3SS secreted effector EspL2; no hit) ECs3857 (T3SS secreted effector NleB1; *C. rodentium*, 89%) ECs3858 (T3SS secreted effector NleE; *C. rodentium*, 86%) ECs4552 (T3SS structure protein EscF; *E. albertii* TW07627, 98%) ECs4553 (chaperone CesD2; *E. albertii* TW07627, 91%) ECs4557 (secretion switching protein SepL; *C. rodentium*, 89%) ECs4558 (T3SS structure protein EscD; *E. albertii* TW07627, 94%) ECs4560 (chaperone CesT; *E. albertii* TW07627, 95%) ECs4568 (translocator EscN; *E. albertii* TW07627, 95%) ECs4569 (translocator EscV; *E. albertii* TW07627, 95%) ECs4570 (regulator Mpc; *E. albertii* TW07627, 96%) ECs4572 (chaperone of T3SS RorF8; *C. rodentium*, 77%) ECs4573 (T3SS structure protein EscJ; *E. albertii* TW07627, 97%) ECs4574 (secretion switching protein SepD; *C. rodentium*, 90%) ECs4575 (T3SS structure protein EscC; *E. albertii* TW07627, 97%) ECs4576 (chaperone CesD; *E. albertii* TW07627, 96%) ECs4577 (positive regulator GrlA; *C. rodentium*, 91%) ECs4578 (negative regulator GrlR; *C. rodentium*, 87%) ECs4580 (T3SS structure protein EscU; *E. albertii* TW07627, 94%) ECs4581 (T3SS structure protein EscT; *E. albertii* TW07627, 93%) ECs4582 (T3SS structure protein EscS; *E. albertii* TW07627, 95%) ECs4583 (T3SS structure protein EscR; *E. albertii* TW07627, 96%) ECs4584 (T3SS machinery component; *C. rodentium*, 76%) ECs4585 (T3SS machinery component; *E. albertii* TW07627, 92%) ECs4587 (T3SS machinery component; *E. albertii* TW07627, 93%) ECs4588 (transcription regulator Ler; *C. rodentium*, 89%) ECsL17 (Hemolysin C; *E. coli* 536, 67%) ECsL18 (Hemolysin A; *E. coli* UTI89, 62%) ECsL19 (Hemolysin B; *E. coli* UTI89, 72%) ECsL20 (Hemolysin D; *E. coli* CFT073, 57%) ECsL88 (polysaccharide deacetylase; *E. fergusonii* ATCC 35469, 70%) ECsL89 (LPS -1,7-N-acetylglucosamine transferase; *E. fergusonii* ATCC 35469, 59%) ECsL91 (lipid A myristoyl transferase; *Citrobacter* sp. 30\_2, 67%)

**Phage function:** ECs0815 (late gene regulator of lambda-like phage; *E. coli* SMS-3-5, 74%) ECs1084 (antitermination protein of lambda-like phage; *E. coli* 536, 86%) ECs1778 (late gene regulator of lambda-like phage; *E. coli* ED1a, 88%) ECs2183/2738 (lipoprotein precursor of lambda-like phage; *E. coli* MG1655, 72%) ECs2166/2725/2949 (tail length tape measure protein of lambda-like phage; *S. boydii* CDC 3083-94, 97%) ECs2168/2951 (minor tail protein of lambda-like phage; *S. boydii* CDC 3083-94, 96%) ECs1092/1216/1787/2256/2965/5623 (lipoprotein precursor of lambda-like phage; *E. coli* BL21, 72%) ECs1214/1533/1785/1965/2258/2967 (antirepressor of lambda-like phage; *Acyrtosiphon pisum*, T5A, 69%)

**Others:** ECs1316 (diacylglycerol kinase; *C. koseri*, 75%) ECs1332 (colicin immunity protein; no hit) ECs2153/2218 (DNA damage-inducible protein; *E. coli* ED1a, 76%) ECs0813/3502 (serine/threonin protein phosphatase; *S. flexneri* phage Sf6, 98%)

**Unknown:** ECs1085 (*Providencia rettgeri* DSM 1131, 50%) ECs1097 (no hit) ECs1315 (no hit) ECs1319 (no hit) ECs1320 (no hit) ECs1331 (no hit) ECs1333 (*E. coli* ED1a, 83%) ECs1342 (*E. coli* CFT073, 68%) ECs1774 (*E. coli* SMS-3-5, 97%) ECs2196 (*S. Typhi* 404ty, 53%) ECs1244/2197 (*Enterobacter sakazakii* ATCC BAA-894, 53%) ECs2199 (*E. coli* SE11, 55%) ECs2200 (*E. coli* SE11, 76%) ECs2202 (*S. Typhimurium* LT2, 56%) ECs2203 (*E. coli* 101-1, 78%) ECs2213 (no hit) ECs1816/2221/2255 (*Edwardsiella ictaluri* 93-146, 96%) ECs1210/2971 (no hit) ECs3489/2716/1809/2230/2157/2940/1229/0845/1993/1124 (*E. albertii* TW07627, 93%) ECs3500/0816 (*E. albertii* TW07627, 97%) ECs4567 (*E. albertii* TW07627, 92%) ECs4579 (*C. rodentium*, 90%) ECs5637/5627/5625/1960/2748/5614 (*E. albertii* TW07627, 56%) ECsL90 (*E. coli* SMS-3-5, 81%)
